# Supplementary material
Source: publisher figshare collection journal article supplement (https://karger.figshare.com/articles/dataset/_/5120884)
Supplement: Supplementary file 1 [file 1]

Table 2. Mean percentage of nucleotide divergence over the entire genome and coding regions among HBV/A-I isolates

| Full-Length     | A          | B                | C                | D          | E           | F          | G          | H           | I          |
|-----------------|------------|------------------|------------------|------------|-------------|------------|------------|-------------|------------|
| B6              | 9.86±0.52  | <b>4.16±0.25</b> | 9.02±0.43        | 11.06±0.59 | 11.58±0.62  | 15.00±0.68 | 13.69±0.70 | 15.32±0.72  | 8.72±0.47  |
| M118            | 10.86±0.68 | <b>4.24±0.28</b> | 9.98±0.55        | 12.66±0.76 | 13.65±0.84  | 16.88±0.83 | 14.86±0.86 | 17.03±0.86  | 9.98±0.59  |
| L15             | 9.91±0.56  | <b>4.31±0.29</b> | 9.38±0.47        | 11.81±0.61 | 12.00±0.65  | 15.43±0.71 | 13.68±0.70 | 15.63±0.75  | 9.24±0.49  |
| G67             | 9.58±0.54  | 14.65±2.81       | <b>5.45±1.17</b> | 12.05±0.66 | 12.50±0.72  | 15.29±0.75 | 13.79±0.81 | 15.54±0.73  | 7.73±0.51  |
| S gene          |            |                  |                  |            |             |            |            |             |            |
| B6              | 5.10±0.84  | 1.14±0.23        | 6.26±0.82        | 5.70±0.91  | 5.58±0.89   | 7.86±1.08  | 6.00±0.95  | 7.61±1.17   | 4.86±0.80  |
| M118            | 5.29±1.00  | 1.60±0.34        | 6.60±1.07        | 6.32±1.10  | 6.18±1.16   | 7.44±1.17  | 6.76±1.26  | 7.68±0.98   | 5.22±1.18  |
| L15             | 5.00±0.81  | 1.81±0.39        | 6.09±0.85        | 6.14±0.93  | 6.06±0.92   | 7.55±1.06  | 5.72±0.92  | 7.80±1.19   | 4.77±0.79  |
| G67             | 5.34±0.85  | 6.15±0.98        | 2.89±0.43        | 5.79±0.93  | 6.10±0.95   | 7.82±1.08  | 6.21±0.97  | 8.74±1.24   | 5.90±0.95  |
| preS2 gene      |            |                  |                  |            |             |            |            |             |            |
| B6              | 17.12±3.28 | 5.36±1.30        | 14.19±2.79       | 16.01±3.34 | 17.93±3.53  | 20.67±3.89 | 17.98±3.61 | 21.37±3.92  | 14.84±3.07 |
| M118            | 17.31±3.14 | 5.48±1.24        | 14.46±2.78       | 16.19±3.20 | 17.23±3.24  | 24.12±4.20 | 18.46±3.57 | 24.80±4.21  | 15.37±3.01 |
| L15             | 16.72±3.13 | 4.97±1.21        | 14.25±2.82       | 15.61±3.18 | 17.02±3.26  | 23.47±4.18 | 17.86±3.55 | 24.16±4.18  | 14.80±3.00 |
| G67             | 15.07±3.00 | 13.28±2.74       | 5.69±1.27        | 11.56±2.74 | 11.86±2.86  | 22.08±4.10 | 14.83±3.29 | 20.95±3.93  | 13.07±2.79 |
| preS1 gene      |            |                  |                  |            |             |            |            |             |            |
| B6              | 16.84±2.20 | 6.15±1.03        | 15.91±1.99       | 22.23±2.92 | 25.81±3.19  | 30.89±3.34 | 27.03±3.29 | 29.30±3.48  | 17.57±2.32 |
| M118            | 13.78±1.92 | 5.21±0.83        | 13.65±1.87       | 22.51±2.87 | 25.21±3.11  | 30.74±3.26 | 26.56±3.14 | 28.34±3.16  | 14.13±1.96 |
| L15             | 19.29±2.77 | 5.53±0.94        | 13.89±1.92       | 23.08±3.19 | 20.90±3.03  | 27.85±3.61 | 23.22±3.25 | 25.00±3.48  | 17.96±2.98 |
| G67             | 19.29±2.77 | 16.81±2.12       | 7.88±1.24        | 23.08±3.19 | 20.90±3.03  | 27.85±3.61 | 23.22±3.25 | 25.00±3.48  | 17.96±2.98 |
| preS1/S2/S gene |            |                  |                  |            |             |            |            |             |            |
| B6              | 10.07±0.95 | 3.14±0.38        | 10.08±0.81       | 11.42±0.96 | 12.79±1.05  | 15.84±1.25 | 13.36±1.17 | 15.40±1.18  | 9.81±0.99  |
| M118            | 10.39±0.83 | 3.56±0.41        | 10.43±0.89       | 13.41±1.00 | 14.71±1.08  | 18.29±1.20 | 15.54±1.12 | 17.80±1.27  | 10.12±0.82 |
| L15             | 9.15±0.84  | 3.28±0.40        | 9.39±0.80        | 11.81±0.97 | 12.931±1.09 | 16.17±1.19 | 13.11±1.13 | 15.741±1.14 | 8.85±0.78  |
| G67             | 8.17±0.83  | 10.63±0.90       | 4.86±0.47        | 12.68±1.00 | 13.06±1.08  | 16.40±1.20 | 13.06±1.12 | 16.281±1.27 | 8.84±0.82  |
| preC/Core gene  |            |                  |                  |            |             |            |            |             |            |
| B6              | 9.14±1.11  | 3.42±0.43        | 3.35±0.53        | 8.93±1.14  | 9.18±1.15   | 11.96±1.43 | 10.69±1.43 | 12.83±1.46  | 4.33±0.77  |
| M118            | 7.08±1.14  | 2.47±0.29        | 3.06±0.51        | 6.88±1.19  | 7.35±1.25   | 9.23±1.37  | 7.71±1.41  | 10.31±1.49  | 3.42±0.77  |
| L15             | 12.29±2.25 | 3.29±0.40        | 3.58±0.56        | 17.87±3.07 | 16.95±2.75  | 19.73±3.20 | 21.02±3.53 | 16.59±2.88  | 17.86±3.02 |
| G67             | 12.88±2.34 | 4.41±0.59        | 2.84±0.43        | 20.71±3.44 | 21.46±3.47  | 22.65±3.53 | 21.16±3.58 | 20.61±3.37  | 14.68±2.54 |
| Core gene       |            |                  |                  |            |             |            |            |             |            |
| B6              | 9.87±1.31  | 3.78±0.49        | 3.82±0.61        | 10.25±1.34 | 10.43±1.37  | 13.39±1.59 | 11.89±1.51 | 14.42±1.64  | 5.04±0.89  |
| M118            | 10.18±1.29 | 3.63±0.42        | 4.13±0.60        | 10.49±1.33 | 11.11±1.41  | 13.75±1.58 | 11.43±1.46 | 15.45±1.71  | 5.29±0.87  |
| L15             | 9.90±1.28  | 3.63±0.44        | 4.08±0.62        | 10.17±1.31 | 10.90±1.39  | 13.75±1.59 | 11.51±1.48 | 15.22±1.70  | 5.29±0.88  |
| G67             | 10.83±1.37 | 4.73±0.60        | 3.02±0.45        | 11.19±1.45 | 11.83±1.49  | 13.37±1.56 | 11.86±1.49 | 14.95±1.70  | 4.98±0.84  |
| X gene          |            |                  |                  |            |             |            |            |             |            |
| B6              | 8.43±1.31  | 3.94±0.74        | 7.16±1.01        | 7.94±1.28  | 7.32±1.26   | 9.62±1.48  | 15.91±2.11 | 11.00±1.56  | 6.37±1.07  |
| M118            | 4.47±0.66  | 1.81±0.39        | 4.41±0.69        | 4.23±0.66  | 4.16±0.65   | 5.19±0.75  | 8.35±1.01  | 5.50±0.79   | 3.56±0.59  |
| L15             | 8.78±1.30  | 3.02±0.55        | 7.27±1.00        | 8.30±1.30  | 8.16±1.29   | 10.21±1.49 | 16.51±2.00 | 10.83±1.55  | 6.96±1.16  |
| G67             | 5.15±0.78  | 5.44±0.82        | 3.74±0.49        | 4.70±0.80  | 3.56±0.72   | 7.76±1.11  | 12.24±1.47 | 8.14±1.17   | 3.79±0.67  |
| P gene          |            |                  |                  |            |             |            |            |             |            |
| B6              | 9.49±1.26  | 4.11±0.31        | 9.84±0.59        | 10.92±1.21 | 11.96±1.17  | 15.36±1.42 | 13.14±1.96 | 15.27±1.59  | 9.34±1.07  |
| M118            | 10.67±0.73 | 4.34±0.34        | 10.99±0.74       | 12.96±0.87 | 14.20±1.01  | 17.44±1.06 | 15.03±0.99 | 17.34±1.10  | 10.83±0.76 |
| L15             | 9.59±0.63  | 4.47±0.32        | 10.40±0.62       | 11.99±0.76 | 12.34±0.85  | 15.66±0.91 | 13.06±0.81 | 15.60±0.96  | 10.06±0.69 |
| G67             | 9.00±0.59  | 10.48±0.66       | 5.35±0.35        | 12.16±0.80 | 12.98±0.83  | 15.68±0.96 | 13.37±0.86 | 15.64±0.96  | 8.27±0.59  |

Genotypes of A-I are grouped isolates of representative genotypes.

\*B6 was the consensus sequence of all the M85 and M84 isolates. M118, L15 and G67 stand for the consensus sequence of all the M118, L15 and G67 isolate, respectively.
